# Supplementary material for: A tumour suppressive relationship between mineralocorticoid and retinoic acid receptors activates a transcriptional program consistent with a reverse Warburg effect in breast cancer
Source: PubMed Central journal article supplement (PMC7641839; doi:10.1186/s13058-020-01355-x), 2020-11-04

**Figure S1****A****GO terms over-represented in positively co-expressed genes in Normal**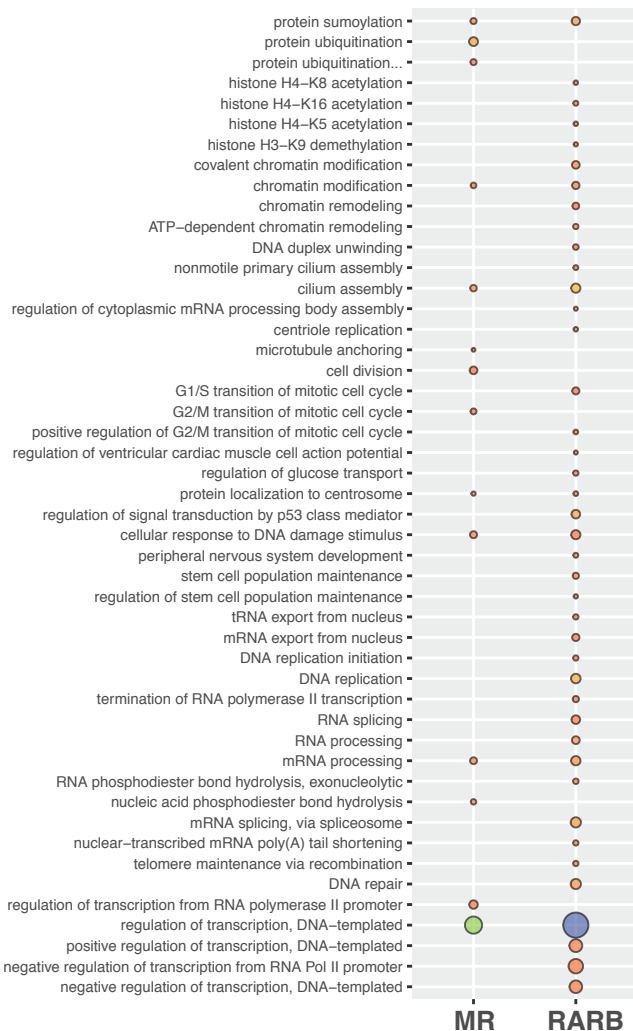**B****GO terms over-represented in negatively co-expressed genes in Normal**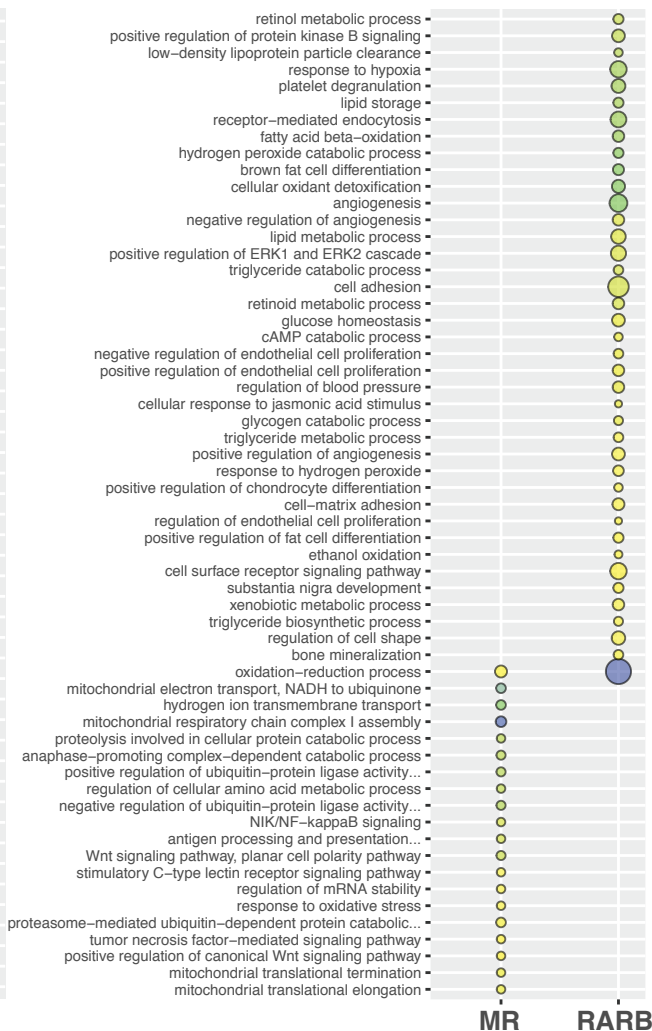**log<sub>10</sub>\_p\_value** **Gene Count**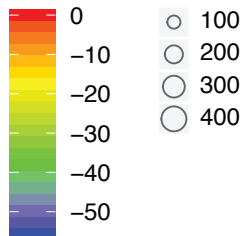**log<sub>10</sub>\_p\_value** **Gene Count**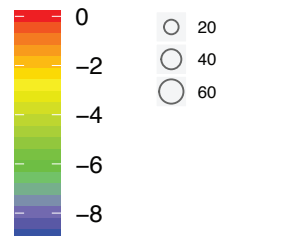

Supplement: 13058_2020_1355_MOESM1_ESM.pdf [file 13058_2020_1355_MOESM1_ESM.pdf]
