# Supplementary material for: A tumour suppressive relationship between mineralocorticoid and retinoic acid receptors activates a transcriptional program consistent with a reverse Warburg effect in breast cancer
Source: PubMed Central journal article supplement (PMC7641839; doi:10.1186/s13058-020-01355-x), 2020-11-04

**A**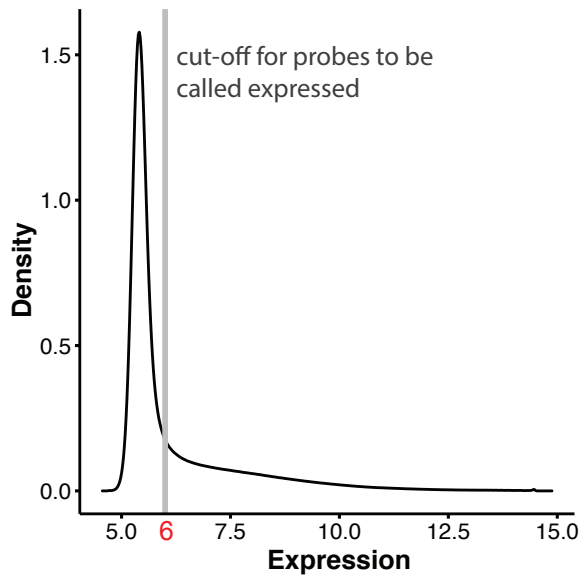**B**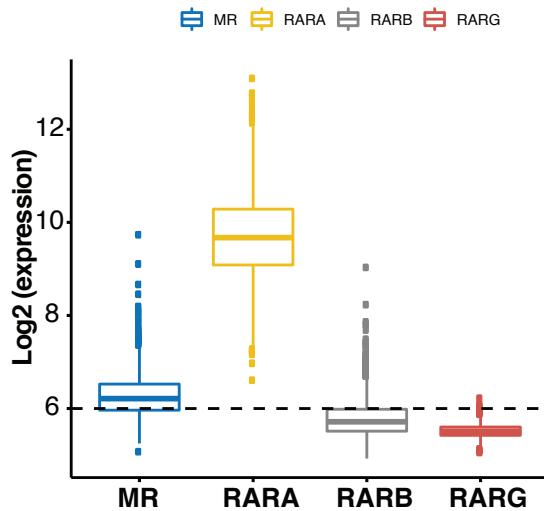**C**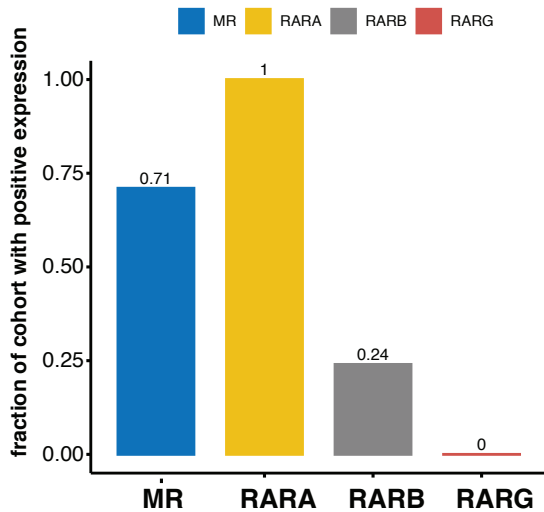**D**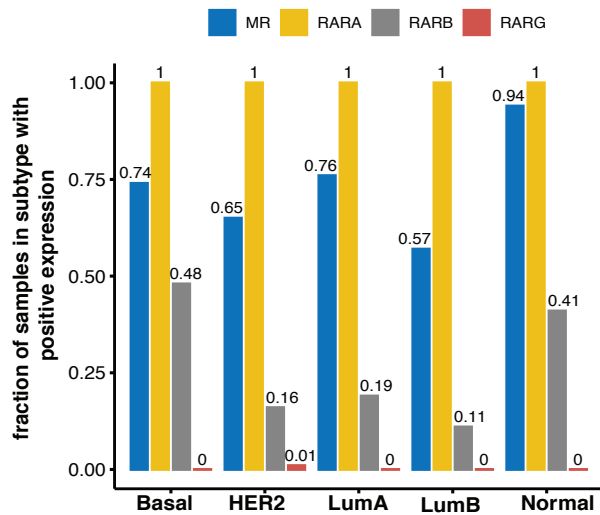

Supplement: 13058_2020_1355_MOESM3_ESM.pdf [file 13058_2020_1355_MOESM3_ESM.pdf]
