# Supplementary material for: A tumour suppressive relationship between mineralocorticoid and retinoic acid receptors activates a transcriptional program consistent with a reverse Warburg effect in breast cancer
Source: Springer Nature journal article supplement (doi:10.1186/s13058-020-01355-x), 2020-11-04

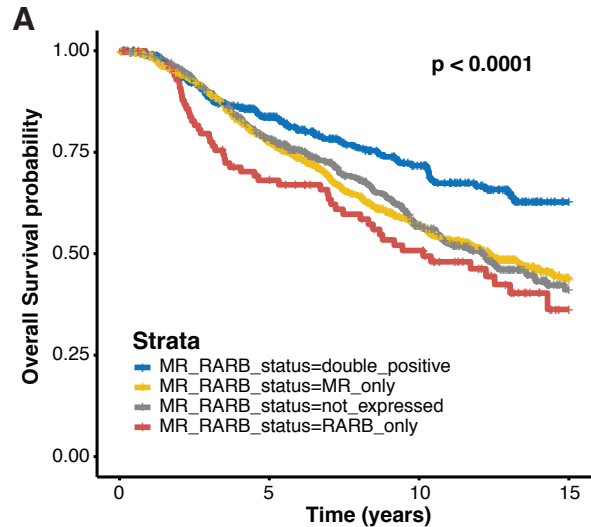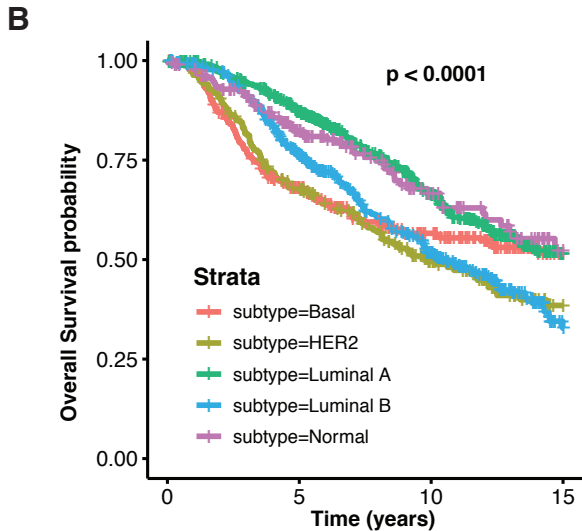

Supplement: MOESM4 [file 18555048]
